# Supplementary material
Source: publisher figshare collection journal article supplement (https://karger.figshare.com/ndownloader/files/40830704)
Supplement: Supplementary file 1 [file 40830704]

**Supplemental table**

| **Reference** | **Age** | **Sex** | **Location** | **Extra pulmonary lesion** | **Radiology** | **Pathology** |
| --- | --- | --- | --- | --- | --- | --- |
| Our case | 25 | F | Bilateral, multiple | Liver, spleen, spine, mandible, and ribs | Multiple pulmonary sub-solid ground glass nodules | Capillary hemangioma in the lungs, cavernous hemangioma in the spine |
| Matsubara et al.[1] | 29 | F | Bilateral, multiple | Liver | Multiple masses  With a progressive centripetal enhancement | Cavernous hemangioma |
| Wang et al.[2] | 35 | F | Bilateral, multiple | Liver and pericardium | Multiple scattered | Cavernous hemangioma |
| Yang et al.[3] | 36 | M | Bilateral, multiple | Pericardium | Bilateral multiple partially solid nodules | Cavernous hemangioma |
| Zhuang et al.[4] | 78 | M | Bilateral, multiple | Liver | Multiple well circumscribed nodules, with uniform density and no calcified spots | Cavernous hemangioma |
| Chen et al.[5] | 19 | F | Bilateral, multiple | Not described | Multiple nodules with uniform density | Cavernous hemangioma |
| Fugo et al.[6] | 48 | F | RML | Not described | Ground glass opacity | Capillary hemangioma |
| Fugo et al.[6] | 56 | M | LLL | Not described | Ground glass opacity | Capillary hemangioma |
| Hashimoto et al.[7] | 30 | M | RML | Not described | Part-solid nodule | Capillary hemangioma |
| Hashimoto et al.[7] | 61 | M | RLL | Not described | Part-solid nodule | Capillary hemangioma |
| Hashimoto et al.[7] | 50 | M | LLL | Not described | Part-solid nodule | Capillary hemangioma |
| Hashimoto et al.[7] | 46 | F | RLL | Not described | Part-solid nodule | Capillary hemangioma |
| Hashimoto et al.[7] | 68 | F | RML | Not described | Pure ground-glass nodule | Capillary hemangioma |
| Hashimoto et al.[7] | 54 | F | LLL | Not described | Part-solid nodule | Capillary hemangioma |
| Hashimoto et al.[7] | 64 | F | RLL | Not described | Part-solid nodule | Capillary hemangioma |
| Hashimoto et al.[8] | 46 | M | LLL | Not described | Part-solid nodule with the air bronchogram sign | Capillary hemangioma |
| Huang et al.[9] | 42 | F | LLL | Not described | Nodule with irregular borders and cystic components | Capillary hemangioma |
| Isaka et al.[10] | 55 | F | LLL | Not described | Mixed ground-glass opacity | Capillary hemangioma |
| Kadowaki et al.[11] | 55 | M | Bilateral, multiple | Not described | Multiple  ground-glass opacities | Capillary hemangioma |
| Kim et al.[12] | 22 | F | Initially, LUL & LLL. Later, LLL & RLL | Not described | Initial: 2 round, solid, well-circumscribed nodules with enhancement  Later: 2 round, solid, well-circumscribed nodules with enhancement | Capillary hemangioma |
| Lee et al.[13] | 55 | M | RML | Not described | Solid nodule | Capillary hemangioma |
| Lee et al.[13] | 50 | M | LUL | Not described | Ground-glass opacity nodule | Capillary hemangioma |
| Maeda et al.[14] | 54 | M | LUL | Not described | Ill-defined mass with a tiny calcification | Cavernous hemangioma |
| Matsushita et al.[15] | 58 | M | LLL | Not described | Part-solid nodule with ground-glass opacity | Capillary hemangioma |
| Miyamoto et al.[16] | 61 | M | Bilateral, multiple | Not described | Multiple well-defined nodules | Cavernous hemangioma |
| Sakaguchi et al.[17] | 53 | F | LUL | Not described | Ground glass opacity | Capillary hemangioma |
| Sirmali et al.[18] | 54 | M | LUL | Not described | Solid mass continuous with LUL vascular bundle | Cavernous hemangioma |
| Zhu et al.[19] | 40 | F | RUL | Not described | Pure ground glass opacity lesion | Capillary hemangioma |

Abbreviations: *RML,* right middle lobe; *LLL*, left lower lobe; *RLL,* right lower lobe; *LUL,* left upper lobe; *RUL*, right upper lobe.

**References**

1. Matsubara S, Nonaka H, Kobayashi M, Kawai A, Fujii H. Uterine artery pseudoaneurysm after dilation and curettage in a woman with multiple hepatic and pulmonary cavernous hemangiomas. Int J Gynaecol Obstet. 2014;125(1):84-5.

2. Wang C, Chen H, Sun L, Mei Y. Cardiac Cavernous Hemangioma Coexisting With Pulmonary Cavernous Hemangiomas and Giant Hepatic Hemangioma. Ann Thorac Surg. 2017;103(2):e149-e52.

3. Yang L, Dai J, Xiao Y, Cheng H, Ruan Q. Cardiac cavernous hemangioma and multiple pulmonary cavernous hemangiomas. Ann Thorac Surg. 2014;97(2):687-9.

4. Zhuang BW, Li W, Chen ZF, Cao CJ, Xie XY, Xie XH. Multiple cavernous hemangiomas of the lung and liver mimicking metastasis: A case report and literature review. Medicine (Baltimore). 2018;97(51):e13509.

5. Chen QR, Li H, Hu B, Jin ML, Guo J. Multiple cavernous hemangiomas of the lung. Ann Thorac Surg. 2014;98(5):1835-7.

6. Fugo K, Matsuno Y, Okamoto K, Kusumoto M, Maeshima A, Kaji M, et al. Solitary capillary hemangioma of the lung: report of 2 resected cases detected by high-resolution CT. Am J Surg Pathol. 2006;30(6):750-3.

7. Hashimoto H, Kurata A, Fujiwara M, Hara K, Matsumoto J, Kusakabe M, et al. Solitary Pulmonary Capillary Hemangioma of Adult Cases: Clinicopathologic Characteristics as an Unrecognized Entity. Am J Surg Pathol. 2016;40(10):1380-9.

8. Hashimoto H, Yanagiya M, Suzuki Y, Kusakabe M, Usui G, Matsumoto J, et al. A case of solitary pulmonary capillary hemangioma indicating true gross appearance. Pathol Int. 2017;67(6):322-3.

9. Tao Huang SJP, John P. Volpe, Raj P. Shah, Mary D. Fiel-Gan Pulmonary capillary hemangioma diagnosed by needle core biopsy: Case report and review of the literature. Human Pathology: Case Reports. 2017;9:50-4.

10. Isaka T, Yokose T, Ito H, Washimi K, Imamura N, Watanabe M, et al. Case of solitary pulmonary capillary hemangioma: pathological features based on frozen section analysis. Pathol Int. 2013;63(12):615-8.

11. Kadowaki T, Yano S, Kobayashi K, Araki K, Tokushima T, Yamadori I. Pulmonary capillary hemangiomatosis-like foci detected by high resolution computed tomography. Intern Med. 2010;49(2):175-8.

12. Kim EY, Kim TS, Han J, Kim H, Choi YS. Recurrent pulmonary capillary hemangioma: dynamic contrast-enhanced CT and histopathologic findings. Korean J Radiol. 2012;13(3):350-4.

13. Lee H-W, Ahn S, Shim YM, Choi YS, Lee K-S, Han J. Solitary Capillary Hemangioma of the Lung: A Report of Two Cases. Journal of Lung Cancer. 2012;11(2).

14. Maeda R, Isowa N, Sumitomo S, Matsuoka K. Pulmonary cavernous hemangioma. Gen Thorac Cardiovasc Surg. 2007;55(4):177-9.

15. Matsushita M, Kawakami S, Matsushita T, Sugiyama Y, Endo M, Shimojo H, et al. Changes in CT density of solitary capillary hemangioma of the lung upon varying patient position. Jpn J Radiol. 2012;30(9):772-6.

16. Miyamoto U, Tominaga M, Tomimitsu S, Nakanishi K, Hayashi A, Irie K. A case of multiple pulmonary cavernous hemangioma. Respirol Case Rep. 2015;3(1):29-32.

17. Sakaguchi Y, Isowa N, Tokuyasu H, Miura H. A resected case of solitary pulmonary capillary hemangioma showing pure ground glass opacity. Ann Thorac Cardiovasc Surg. 2014;20 Suppl:578-81.

18. Sirmali M, Demirag F, Aydin E, Karasu S, Kaya S. A pulmonary cavernous hemangioma causing massive hemoptysis. Ann Thorac Surg. 2003;76(4):1275-6.

19. Zhu Y, Qu N, Sun L, Meng X, Li X, Zhang Y. Solitary pulmonary capillary hemangioma presents as ground glass opacity on computed tomography indicating adenocarcinoma in situ/atypical adenomatous hyperplasia: A case report. Biomed Rep. 2017;7(6):515-9.
